# Supplementary material
Source: PubMed Central journal article supplement (PMC6248105)
Supplement: jama-320-1764-s004.pdf [file jama-320-1764-s004.pdf]

# Data Sharing Statement

Borlaug. Effect of Inorganic Nitrite vs Placebo on Exercise Capacity Among Patients With Heart Failure With Preserved Ejection Fraction. *JAMA*. Published November 06, 2018. 10.1001/jama.2018.14852

## Data

**Data available:** Yes

**Data types:** Deidentified participant data

**How to access data:** Data will be made available under the NHLBI policy for public access, 2 years after last patient visit, in a deidentified format.

**When available:** beginning date: 01-02-2020

## Supporting Documents

**Document types:** None

## Additional Information

**Who can access the data:** The data will be made available to researchers whose proposed use of the data has been approved according to NHLBI policy.

**Types of analyses:** The data will be made available for any purpose provided that it has been approved according to NHLBI policy.

**Mechanisms of data availability:** Data will be made available without investigator support and after approval according to NHLBI policy.
